# Supplementary material for: Treatment for acute bronchiolitis before and after implementation of new national guidelines: a retrospective observational study from primary and secondary care in Oslo, Norway
Source: PubMed Central journal article supplement — BMJ Paediatr Open. 2021 May 20;5(1):e001111. doi: 10.1136/bmjpo-2021-001111 (PMC8141443; doi:10.1136/bmjpo-2021-001111), 2021-05-20
Supplement: bmjpo-2021-001111.draft_revisions.pdf [file bmjpo-2021-001111.draft_revisions.pdf]

# BMJ Paediatrics Open

BMJ Paediatrics Open is committed to open peer review. As part of this commitment we make the peer review history of every article we publish publicly available.

When an article is published we post the peer reviewers' comments and the authors' responses online. We also post the versions of the paper that were used during peer review. These are the versions that the peer review comments apply to.

The versions of the paper that follow are the versions that were submitted during the peer review process. They are not the versions of record or the final published versions. They should not be cited or distributed as the published version of this manuscript.

BMJ Paediatrics Open is an open access journal and the full, final, typeset and author-corrected version of record of the manuscript is available on our site with no access controls, subscription charges or pay-per-view fees (<http://bmjpaedsopen.bmj.com>).

If you have any questions on BMJ Paediatrics Open's open peer review process please email [info.bmjpo@bmj.com](mailto:info.bmjpo@bmj.com)

# BMJ Paediatrics Open

## **Treatment for acute bronchiolitis before and after implementation of new national guidelines: an observational study from primary and secondary care in Oslo, Norway**

|                               |                                                                                                                                                                                                                                                                                                                                  |
|-------------------------------|----------------------------------------------------------------------------------------------------------------------------------------------------------------------------------------------------------------------------------------------------------------------------------------------------------------------------------|
| Journal:                      | <i>BMJ Paediatrics Open</i>                                                                                                                                                                                                                                                                                                      |
| Manuscript ID                 | bmjpo-2021-001111                                                                                                                                                                                                                                                                                                                |
| Article Type:                 | Original research                                                                                                                                                                                                                                                                                                                |
| Date Submitted by the Author: | 29-Mar-2021                                                                                                                                                                                                                                                                                                                      |
| Complete List of Authors:     | Klem, Nicolai; University of Oslo, Department of General Practice Skjerven, Håvard Ove; Oslo University Hospital<br>Nilsen, Beate; Oslo Accident and Emergency Outpatient Clinic<br>Brekke, Mette; University of Oslo, Department of General Practice Vällersnes, Odd Martin; University of Oslo, Department of General Practice |
| Keywords:                     | Health services research, Virology, Therapeutics                                                                                                                                                                                                                                                                                 |
|                               |                                                                                                                                                                                                                                                                                                                                  |

SCHOLARONE™  
Manuscripts

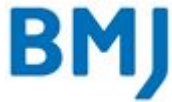

I, the Submitting Author has the right to grant and does grant on behalf of all authors of the Work (as defined in the below author licence), an exclusive licence and/or a non-exclusive licence for contributions from authors who are: i) UK Crown employees; ii) where BMJ has agreed a CC-BY licence shall apply, and/or iii) in accordance with the terms applicable for US Federal Government officers or employees acting as part of their official duties; on a worldwide, perpetual, irrevocable, royalty-free basis to BMJ Publishing Group Ltd ("BMJ") its licensees and where the relevant Journal is co-owned by BMJ to the co-owners of the Journal, to publish the Work in this journal and any other BMJ products and to exploit all rights, as set out in our [licence](#).

The Submitting Author accepts and understands that any supply made under these terms is made by BMJ to the Submitting Author unless you are acting as an employee on behalf of your employer or a postgraduate student of an affiliated institution which is paying any applicable article publishing charge ("APC") for Open Access articles. Where the Submitting Author wishes to make the Work available on an Open Access basis (and intends to pay the relevant APC), the terms of reuse of such Open Access shall be governed by a Creative Commons licence – details of these licences and which [Creative Commons](#) licence will apply to this Work are set out in our licence referred to above.

Other than as permitted in any relevant BMJ Author's Self Archiving Policies, I confirm this Work has not been accepted for publication elsewhere, is not being considered for publication elsewhere and does not duplicate material already published. I confirm all authors consent to publication of this Work and authorise the granting of this licence.

1  
2  
3 **Treatment for acute bronchiolitis before and after**  
4  
5  
6 **implementation of new national guidelines: an observational study**  
7  
8  
9 **from primary and secondary care in Oslo, Norway**  
10  
11  
12  
13  
14  
15  
16  
17

18 Nicolai Klem<sup>1,2</sup>, Håvard Ove Skjerven<sup>3</sup>, Beate Nilsen<sup>1</sup>, Mette Brekke<sup>4</sup>, Odd Martin

19  
20 Vallersnes<sup>1,2</sup>  
21  
22  
23  
24

25 **Affiliations:**

- 26  
27 1. Oslo Accident and Emergency Outpatient Clinic, Department of Emergency General  
28 Practice, City of Oslo Health Agency, Oslo, Norway  
29  
30 2. Department of General Practice, University of Oslo, Oslo, Norway  
31  
32 3. Department of Paediatrics, Oslo University Hospital, Oslo, Norway  
33  
34 4. General Practice Research Unit, University of Oslo, Oslo, Norway  
35  
36  
37  
38  
39  
40

41 **Address of correspondence to:**

42 Nicolai Klem, MD.

43  
44 Oslo Accident and Emergency Outpatient Clinic, Department of Emergency General Practice,  
45  
46 City of Oslo Health Agency, Oslo, Norway  
47  
48

49 Falbesgate 18D, 0170 Oslo  
50

51 E-mail: [nicolaiklem@gmail.com](mailto:nicolaiklem@gmail.com), +47 92296568.  
52  
53  
54  
55  
56  
57  
58  
59

60 **Word count:** 2328

**What is known about the subject**

- Treatment guidelines for acute bronchiolitis no longer recommend the use of nebulized adrenaline
- Guidelines, often made in the specialist health services for specific conditions, are often perceived not to fit the primary care population

**What this study adds**

- The successful implementation of a new treatment guideline for acute bronchiolitis, reduced the use of nebulized adrenaline both in primary and secondary care
- An inverse rise in the use of nebulized saline was seen in both settings, though not specifically recommended
- Use of antibiotics remained low

## ABSTRACT

**Background:** Acute bronchiolitis treatment guidelines changed in Norway in 2013, no longer recommending the use of nebulized adrenaline. We aimed to assess whether these changes were successfully implemented in both primary and secondary care. Secondary aims were to compare the difference in management of acute bronchiolitis patients in primary and secondary care between 2009 and 2017.

**Methods:** We retrospectively registered data on demographics, clinical features and management from electronic medical records of all infants (<12 months of age) diagnosed with acute bronchiolitis at a primary care centre (Oslo Accident and Emergency Outpatient Clinic) and a secondary care centre (Oslo University Hospital) in Norway in 2009, 2014, and 2017. All patient records were individually reviewed to ensure data accuracy.

**Results:** We included 680 (36.3%) patients from primary care and 1195 (63.7%) from secondary care. There was a reduction in the use of nebulized adrenaline from 2009 to 2017 from 66.9% to 16.1% of cases ( $p<0.001$ ) in primary care and from 59.1 % to 4.9 % ( $p<0.001$ ) in secondary care. In parallel, there was an increase in the use of nebulized saline treatment, from 0.8% to 53.8% ( $p<0.001$ ) in primary care and from 39.3% to 65.3% ( $p<0.001$ ) in secondary care. The decrease in the use of nebulized racemic adrenaline occurred earlier in secondary care than in primary care; 13.4 % vs 56.1%, respectively, in 2014.

**Conclusions:** Implementation of the new guidelines on the treatment of acute bronchiolitis were successfully implemented in both primary and secondary care.

**Key words:** Compliance, treatment guidelines, bronchiolitis, nebulizer treatment, racemic adrenaline, saline, RS-virus, antibiotic treatment, primary vs secondary care

## INTRODUCTION

Bronchiolitis is an acute viral lower respiratory tract infection affecting infants below one year of age.(1) Multiple treatment options have been recommended and used throughout different regions and time periods, including nebulized beta-2-agonists, nebulized racemic adrenaline, systemic corticosteroids, antibiotics, and nebulized hypertonic saline.(1-4) Mecklin et al. showed that all of these options were used in infants below 12 months of age with bronchiolitis between 2000 and 2015 in Tampere, Finland, with an increasing use of nebulized hypertonic saline.(5) In 2013, nebulized racemic adrenaline was removed from the Norwegian national acute bronchiolitis treatment guidelines(6) as a consequence of the Bronchiolitis All-Study SE Norway that found no difference in patient outcomes in children given nebulized racemic adrenaline vs. children given nebulized saline.(2) In general, recently published guidelines from different regions recommend supportive care only and a minimal handling strategy in the treatment for acute bronchiolitis patients.(7-10)

Adherence to clinical guidelines in general practice has room for improvements.(11) One plausible explanation is that guidelines are often made by secondary care specialists for specific conditions that do not necessarily fit the primary care population.(12) The Norwegian guidelines for acute bronchiolitis are made by paediatricians for secondary care, but parts of the guidelines have been used also in Norwegian primary care.(6) To the best of our knowledge, no studies have compared how the same changes in a clinical guideline have been implemented in both primary and secondary care.

## Aims

The primary aim of the study was to determine whether the new national treatment guidelines for acute bronchiolitis in Norway, published in 2013, were implemented in primary and

1  
2  
3 secondary care. Secondary aims were to compare the difference in management of acute  
4  
5 bronchiolitis patients in primary and secondary care between 2009 and 2017.  
6  
7  
8  
9  
10

## 11 **METHODS**

### 12 **Study design**

13  
14  
15 A retrospective observational study of children < 12 months of age presenting with acute  
16  
17 bronchiolitis at the Oslo Accident and Emergency Outpatient Clinic (OAEOC) or at the Oslo  
18  
19 University Hospital, Division of Paediatric and Adolescent Medicine (OUH), in Oslo,  
20  
21 Norway, in 2009, 2014, and 2017.  
22  
23  
24  
25  
26  
27

### 28 **Settings**

29  
30 The Norwegian healthcare system is two-tiered, with primary care holding a gate-keeping  
31  
32 function for secondary care. Unless triaged directly for hospital treatment by the ambulance  
33  
34 service, patients at all ages are assessed in primary care, usually by local family physicians  
35  
36 during office hours, or at primary care emergency outpatient clinics at weekends and nights. If  
37  
38 the primary care doctor decides that the patient needs secondary care, the patient is transferred  
39  
40 to hospital.  
41  
42  
43  
44  
45

46  
47 In Oslo, the main primary care emergency clinic is the OAEOC, open 24 hours a day, 365  
48  
49 days a year. Diagnostic and treatment resources include chest X-rays, point-of-care blood  
50  
51 tests, and nebulizer treatment. Oslo is the capital city of Norway and had 666 759 inhabitants  
52  
53 as per 1.1.2017.(13) The paediatric population (children < 18 years of age) in the OAEOC  
54  
55 catchment area was 137 233 as per 1.1.2017, while the OUH catchment area, covering 12 of  
56  
57 15 city districts, encompassed 110 958.(13)  
58  
59  
60



## Participants

We included all patients below the age of 12 months diagnosed with bronchiolitis at the OAEOC or the OUH from the 1<sup>st</sup> of January to the 31<sup>st</sup> of December of the three years 2009, 2014, and 2017.

At the OAEOC, eligible patients were identified from the patient registration lists in the electronic medical records. If the triage nurse had described airway illness as the presenting complain in a child below the age of 12 months, the case notes were reviewed by study personnel and the patient included if given a bronchiolitis diagnosis (R78 in the International Classification of Primary Care, 2<sup>nd</sup> edition (ICPC-2))(14) or treated for bronchiolitis with relevant bronchiolitis symptoms noted. At the OUH, all contacts involving patients below the age of 12 months with a diagnosis of bronchiolitis (J21 in the International Classification of Diseases and Related Health Problems (ICD-10))(15) were identified through an electronic search in the medical records. Electronic patient records for each acute admission were reviewed. In both settings, patients were included case by case, while planned follow-up contacts were excluded. Hence, one patient could be included several times as different cases.

We reviewed 5233 patient records at the OAEOC and 1520 at the OUH, yielding 680 included cases from the OAEOC and 1195 from the OUH.

## Variables

We registered demographic data (gender, age), vital signs (heart rate, oxygen saturation, respiratory rate, temperature), and clinical signs of respiratory distress (retractions, cyanosis). Furthermore, we registered treatment given, including nebulized medication (racemic

1  
2  
3 adrenaline, saline, salbutamol), oxygen, high-flow nasal oxygen, ventilatory support  
4  
5 (continuous positive airway pressure (CPAP), bilevel positive airway pressure (BPAP),  
6  
7 respirator), nasogastric tube feeding, antipyretics, steroids, and antibiotics. Supplementary  
8  
9 investigations were also registered, including C-reactive protein (CRP), nasopharyngeal  
10  
11 swabs for virus and atypical bacterial agents, and chest X-rays. At the OAEOC, a CRP point-  
12  
13 of-care test was used, not measuring values  $< 5$  mg/L, while the OUH used a laboratory CRP  
14  
15 test. Finally, we registered length of stay, whether the patient was transferred to hospital from  
16  
17 the OAEOC, whether nebulizer home treatment was initiated, and whether the patient re-  
18  
19 presented to the clinic within 48 hours.  
20  
21  
22  
23  
24  
25

### 26 **Statistical methods**

27  
28 All data were analysed in IBM SPSS version 26 (IBM Corp., Chicago, IL). Pearson's chi-  
29  
30 square test was used to compare frequencies. For continuous data, one-way analysis of  
31  
32 variance (ANOVA) was used. Kruskal-Wallis test was used for the CRP data, which did not  
33  
34 follow the normal distribution. The significance level was set to 5 percent. Imputation for  
35  
36 missing data was not performed.  
37  
38  
39  
40  
41

### 42 **Ethics**

43  
44 The study was a quality improvement study, as per the Norwegian Law on Health Personnel  
45  
46 §26, retrospectively collecting anonymous data already registered in patient records.  
47  
48 Accordingly, the need for approval from an ethics committee was waived, as was the need to  
49  
50 obtain consent to participate. The study was approved by the Oslo University Hospital  
51  
52 Information Security and Privacy Office, and by the director of the Department of Emergency  
53  
54 General Practice at the City of Oslo Health Agency.  
55  
56  
57  
58  
59  
60

## RESULTS

We included 680 cases from primary care and 1195 cases from secondary care. Mean age was higher in primary care than in secondary care, 6.1 months versus 4.8 months ( $p < 0.001$ ). The gender distribution was similar, with 60.9 % boys in both settings. Clinical characteristics are shown in table 1.

There was a reduction in the use of nebulized racemic adrenaline treatment from 2009 to 2017; from 66.9 % (162/242) of cases to 16.1 % (32/199) ( $p < 0.001$ ) in primary care and from 59.1 % (257/435) to 4.9 % (19/386) ( $p < 0.001$ ) in secondary care (table 2).

Simultaneously, there was an increase in the use of nebulized saline treatment; from 0.8 % (2/242) to 53.8 % (107/199) ( $p < 0.001$ ) in primary care and from 39.3 % (171/435) to 65.3 % (252/386) ( $p < 0.001$ ) in secondary care. The decrease in the use of nebulized racemic adrenaline occurred earlier in secondary care (13.4 % (50/374) in 2014) than in primary care (56.1 % (134/239) in 2014).

In secondary care, there was also a reduction from 2009 to 2017 in the use of nebulized salbutamol from 14.5 % (63/435) of cases to 6.5 % (25/386) ( $p = 0.001$ ), an increase in the use of oxygen supplement from 9.9 % (43/435) to 19.4 % (75/386) ( $p < 0.001$ ), and of antipyretics from 6.2 % (27/435) to 13.0 % (50/386) ( $p = 0.004$ ) (table 2). In-hospital antibiotic use was low throughout the study period; 1.9 % in 2009, 2.7 % in 2014 and 4.3 % in 2017 ( $p = 0.136$ ). Antibiotic home-treatment initiated from the hospital was reduced from 4.6 % (20/435) to 2.8 % (11/386) ( $p = 0.047$ ).

1  
2  
3 Furthermore, there was a decrease in the use of chest X-ray as a diagnostic tool, from 4.1 %  
4 (10/242) to none ( $p < 0.001$ ) in primary care and from 31.0 % (135/435) to 19.2 % (74/386)  
5  
6 (p < 0.001) in secondary care (table 2). At the hospital, microbiological tests were performed  
7  
8 in 72.6 % (867/1195) of the children. RS-virus was the main agent throughout, found in 69.3  
9  
10 % (601/867) of the samples (table 3).  
11  
12  
13  
14  
15  
16  
17  
18

## 19 **DISCUSSION**

20  
21 In accordance with the guidelines published in 2013, the use of nebulized racemic adrenaline  
22  
23 was substantially reduced from 2009 to 2017 in both primary and secondary care. The change  
24  
25 occurred earlier (2014) in secondary than in primary care. In the same period, the use of  
26  
27 nebulized saline increased and antibiotics decreased in both settings. In hospital, the use of  
28  
29 oxygen and antipyretics increased.  
30  
31  
32  
33  
34

35  
36 The new treatment guidelines were implemented already in 2014 in secondary care and well  
37  
38 implemented in primary care in 2017. One can argue that this was fairly successful, as  
39  
40 implementation of guidelines are known to take time.(16, 17) Our results show slower  
41  
42 adaption to the guidelines in primary care than in secondary care. There is research suggesting  
43  
44 low adherence to guidelines in primary care,(11) which would support our findings. Primary  
45  
46 care physicians experience several barriers for adherence to guidelines, where lack of  
47  
48 awareness and lack of familiarity are the two most commonly reported.(18, 19) As physicians  
49  
50 in primary care manage patients of all ages with a wide spectrum of illnesses, the  
51  
52 implementation of guidelines for specific illnesses might not get general attention.(12) The  
53  
54 Bronchiolitis All-Study SE was conducted at the OUH previously to the guideline  
55  
56 implementation, directly involving most doctors and nurses attending the acute ward.(2, 20)  
57  
58  
59  
60

1  
2  
3 This would suggest a higher awareness and familiarity to the new guidelines at the hospital,  
4 leading to faster adaptation. We consider full time employees and internal education programs  
5  
6 leading to faster adaptation. We consider full time employees and internal education programs  
7  
8 at both clinics crucial for successful implementation.  
9

10  
11  
12 Apart from the primary care delay in implementing the new guidelines, we found similar  
13  
14 changes in the initial treatment of patients with acute bronchiolitis in primary and secondary  
15  
16 care. The increase in nebulized saline use is not evidence based and not recommended by  
17  
18 national guidelines. Overtreatment is an acknowledged challenge in medicine,(21) and there  
19  
20 is a possibility that the increasing use of nebulized saline is a consequence of the urge of  
21  
22 health care personnel to do something, by providing any specific therapy, rather than what  
23  
24 actually benefits the patients.  
25  
26  
27  
28  
29

30  
31 The reduction in the use of nebulized beta-2-agonists is supported by new guidelines and  
32  
33 research,(2, 9, 22-25) and is a focus across the world.(24, 25) Antibiotic treatment is not  
34  
35 recommended for acute bronchiolitis,(9, 26, 27) and overuse is a known problem.(28-30) Our  
36  
37 results showed a very low use of antibiotics, consistently below 5 %, compared to other  
38  
39 countries, where rates in the range of 3.5–11.1 % are reported.(28)  
40  
41  
42  
43  
44

45 We found a steady rise in the use of highflow oxygen in the hospital setting. Recent research  
46  
47 has not clearly shown that this is beneficial for acute bronchiolitis treatment.(31, 32) Hospital  
48  
49 length of stay did not change during the study time period. However, there was an increase in  
50  
51 the proportion of patients discharged within 24 hours, from 49.9 % to 61.4 %, signifying that  
52  
53 a majority of hospital bronchiolitis patients only need a short period of supportive care.  
54  
55  
56  
57  
58  
59  
60

1  
2  
3 No more than 40 % of the bronchiolitis patients at the OAEOC were sent on to secondary  
4 care. This contribution to reducing hospital emergency department crowding is an advantage  
5 of a gate keeping primary care emergency health service. The availability of nebulizer  
6 treatment and short-term observation gives the OAEOC the capacity to treat and observe  
7 children with a wide variety of airway symptoms, and hence better to identify the patients in  
8 need of hospital treatment.  
9  
10  
11  
12  
13  
14  
15  
16  
17  
18

19 The main agent causing bronchiolitis is known to be RS-virus,(33, 34) as was the case in our  
20 study, with Rhinovirus the second most common agent. Two or more agents were found in  
21 more than one out of four children, less frequently than the 61% co-infections found by  
22 Skjerven et al. in their review from 2016.(35) A relationship between viral findings and the  
23 severity of respiratory disease in infants with acute bronchiolitis has not been established,  
24 though it has been suggested that high genomic load can lead to longer hospital stay and more  
25 use of oxygen and ventilatory support.(35, 36)  
26  
27  
28  
29  
30  
31  
32  
33  
34  
35  
36  
37

### 38 **Strengths and limitations**

39 Our study included a large patient population from both primary and secondary care.  
40 Encompassing the two largest emergency departments for children in Oslo, our study  
41 population is representative of the city population. Though patients were not included if  
42 managed at other smaller primary care clinics, or referred by them or the ambulance service  
43 directly to the neighbouring paediatric hospital covering the remaining 3 of 15 city districts,  
44 this number is probably small and the population is most likely similar to ours. We therefore  
45 consider our results to be representative for the population of children with acute bronchiolitis  
46 needing primary and/or hospital care in Norway.  
47  
48  
49  
50  
51  
52  
53  
54  
55  
56  
57  
58  
59  
60

1  
2  
3 The medical journal of every study subject was thoroughly examined by the first author,  
4  
5 ensuring as complete and accurate data as possible.  
6  
7  
8  
9

10 Eligible patients were found retrospectively, and we sought to limit selection bias by having  
11  
12 clear and strict inclusion criteria. Still, some interpretation was necessary in the primary care  
13  
14 setting in cases where bronchiolitis had not been set as the main diagnosis and the patient was  
15  
16 included based on the case notes. Only the first author reviewed the patient records. This  
17  
18 secured a more consistent inclusion of patients, but at the same time carried the risk of  
19  
20 increased selection bias.  
21  
22  
23  
24  
25

26 Since the inclusion of some patients was based on strict criteria from case notes, we may have  
27  
28 missed some patients in the primary care group receiving ICPC-2 symptoms diagnoses rather  
29  
30 than the specific diagnosis of acute bronchiolitis. This may also partly explain why the  
31  
32 number of included patients was lower at the OAEOC than the OUH. Furthermore, the  
33  
34 ambulance service brings severely sick patients directly to hospital, hence bypassing the  
35  
36 OAEOC.  
37  
38  
39  
40  
41

## 42 **Conclusion**

43  
44 There was a large and highly significant reduction in the use of nebulized racemic adrenaline  
45  
46 treatment after the introduction of new national guidelines in 2013, both in primary and  
47  
48 secondary health care. Simultaneously, there was an increase in the use of nebulized saline.  
49  
50 Implementation of the new guidelines occurred earlier in the hospital setting than in primary  
51  
52 care.  
53  
54  
55  
56  
57  
58  
59  
60

### **Acknowledgements**

We thank the Department of Microbiology at the Oslo University Hospital for making the microbiological data available to us.

### **Funding statement**

Dr Klem received a six months scholarship from the Norwegian Committee on Research in General Practice (Allmenntmedisinsk Forskningsutvalg (AFU)), a committee of the Norwegian College of General Practitioners.

### **Data sharing statement**

Data are currently not available for sharing. Several manuscripts based on the data set are in preparation. Requests concerning the data may be sent to the corresponding author.

### **Authors' contributions**

NK conceived and designed the study, collected and analysed the data, and drafted and revised the manuscript. HOS, MB, and BN contributed to designing the study and revised the manuscript. OMV contributed to designing the study, revised the manuscript, and supervised the project.

### **Competing interests:**

The authors have no conflicts of interest to disclose.

### **Patient and public involvement**

Patients were not involved in designing the study, but will be involved in disseminating the results to the wider patient community.



**REFERENCES**

1. Gadomski AM, Scribani MB. Bronchodilators for bronchiolitis. *Cochrane Database Syst Rev* 2014(6):CD001266.
2. Skjerven HO, Hunderi JO, Brüggmann-Pieper SK, et al. Racemic adrenaline and inhalation strategies in acute bronchiolitis. *N Engl J Med* 2013;368:2286-93.
3. Zorc JJ, Hall CB. Bronchiolitis: recent evidence on diagnosis and management. *Pediatrics* 2010;125:342-9.
4. Fernandes RM, Bialy LM, Vandermeer B, et al. Glucocorticoids for acute viral bronchiolitis in infants and young children. *Cochrane Database Syst Rev* 2013(6):CD004878.
5. Mecklin M, Heikkila P, Korppi M. The change in management of bronchiolitis in the intensive care unit between 2000 and 2015. *Eur J Pediatr* 2018;177:1131-7.
6. Norsk barnelegeforening. Akuttveileder i pediatri. <http://www.helsebiblioteket.no/retningslinjer/akuttveileder-i-pediatri/forside> (accessed 11 May 2017).
7. McNaughten B, Hart C, Shields M. Management of bronchiolitis in infants: key clinical questions. *Paediatr Child Health* 2017;27:324-7.
8. Everard ML, Hind D, Ugonna K, et al. Saline in acute bronchiolitis RCT and economic evaluation: hypertonic saline in acute bronchiolitis - randomised controlled trial and systematic review. *Health Technol Assess* 2015;19:1-130.
9. Ralston SL, Lieberthal AS, Meissner HC, et al. Clinical practice guideline: the diagnosis, management, and prevention of bronchiolitis. *Pediatrics* 2014;134:e1474-502.

10. National Institute of Health and Care Excellence. NICE Guidelines 2015. Bronchiolitis in children diagnosis and management, 2015. <https://www.nice.org.uk/guidance/ng9> (accessed 11 May 2017).
11. Lugtenberg M, Burgers JS, Han D, et al. General practitioners' preferences for interventions to improve guideline adherence. *J Eval Clin Pract* 2014;20:820-6.
12. Austad B, Hetlevik I, Mjølstad BP, et al. Applying clinical guidelines in general practice: a qualitative study of potential complications. *BMC Fam Pract* 2016;17:92.
13. Oslo Municipality Statistics Database, 2017. <http://statistikkbanken.oslo.kommune.no/webview/index.jsp?catalog=http%3A%2F%2Fstatistikkbanken.oslo.kommune.no%3A80%2Fobj%2FfCatalog%2FCatalog48&submode=catalog&mode=documentation&top=yes> (accessed 11 Apr 2019).
14. World Health Organization. International Classification of Primary Care, 2nd ed. (ICPC-2). Geneva, 2003. <http://www.who.int/classifications/icd/adaptations/icpc2/en/> (accessed 11 May 2019).
15. World Health Organization. The ICD-10 classification of mental and behavioural disorders: clinical descriptions and diagnostic guidelines. Geneva, 1992. <https://www.who.int/classifications/icd/en/bluebook.pdf> (accessed 11 May 2019).
16. Austad B, Hetlevik I, Bugten V, et al. Implementing guidelines for follow-up after surgery with ventilation tube in the tympanic membrane in Norway: a retrospective study. *BMC Ear Nose Throat Disord* 2013;13:5.
17. Aftab RA, Khan AH, Sulaiman SAS, et al. Does guideline knowledge affect treatment compliance among emergency doctors? *Am J Med Sci* 2014;348:357-61.
18. Lugtenberg M, Zegers-van Schaick JM, Westert GP, et al. Why don't physicians adhere to guideline recommendations in practice?: an analysis of barriers among Dutch general practitioners. *Implement Sci* 2009;4:54.

19. Cabana MD, Rand CS, Powe NR, et al. Why don't physicians follow clinical practice guidelines. *JAMA* 1999;282:1458-65.
20. Oymar K, Skjerven HO, Mikalsen IB. Acute bronchiolitis in infants: a review. *Scand J Trauma Resusc Emerg Med* 2014;22:23.
21. Armstrong N. Overdiagnosis and overtreatment as a quality problem: insights from healthcare improvement research. *BMJ Qual Saf* 2018;27:571-5.
22. Hartling L, Fernandes RM, Bialy L, et al. Steroids and bronchodilators for acute bronchiolitis in the first two years of life: systematic review and meta-analysis. *BMJ* 2011;342:d1714.
23. Meissner HC. Viral bronchiolitis in children. *N Engl J Med* 2016;374:62-72.
24. Montejo M, Paniagua N, Saiz-Hernando C, et al. Initiatives to reduce treatments in bronchiolitis in the emergency department and primary care. *Arch Dis Child* 2021;106:294-300.
25. Oakley E, Brys T, Borland M, et al. Medication use in infants admitted with bronchiolitis. *Emerg Med Australas* 2018;30:389-97.
26. Friis B, Andersen P, Brenøe E, et al. Antibiotic treatment of pneumonia and bronchiolitis: a prospective randomised study. *Arch Dis Child* 1984;59:1038-45.
27. Hall CB, Powell KR, Schnabel KC, et al. Risk of secondary bacterial infection in infants hospitalized with respiratory syncytial viral infection. *J Pediatr* 1988;113:266-71.
28. Zipursky A, Kuppermann N, Finkelstein Y, et al. International practice patterns of antibiotic therapy and laboratory testing in bronchiolitis. *Pediatrics* 2020;146:e20193684.
29. Lopez AA, Aslanova R, Bridger N, et al. Antibiotic use for inpatient bronchiolitis: did national guidelines impact practice at a pediatric hospital? *Hosp Pediatr* 2020;10:147-52.

- 1  
2  
3 30. Papenburg J, Fontela PS, Freitas RR, et al. Inappropriate antibiotic prescribing for acute  
4  
5 bronchiolitis in US emergency departments, 2007-2015. *J Pediatric Infect Dis Soc*  
6  
7 2019;8:567-70.  
8  
9  
10 31. Franklin D, Babl FE, Schlapbach LJ, et al. A randomized trial of high-flow oxygen  
11  
12 therapy in infants with bronchiolitis. *N Engl J Med* 2018;378:1121-31.  
13  
14 32. Lin J, Zhang Y, Xiong L, et al. High-flow nasal cannula therapy for children with  
15  
16 bronchiolitis: a systematic review and meta-analysis. *Arch Dis Child* 2019;104:564-76.  
17  
18 33. Miron D, Srugo I, Kra-Oz Z, et al. Sole pathogen in acute bronchiolitis: is there a role for  
19  
20 other organisms apart from respiratory syncytial virus? *Pediatr Infect Dis J* 2010;29:e7-  
21  
22 e10.  
23  
24 34. Carlsen KH, Ørstavik I, Halvorsen K. Viral infections of the respiratory tract in  
25  
26 hospitalized children: a study from Oslo during a 90 months period. *Acta Paediatr Scand*  
27  
28 1983;72:53-8.  
29  
30 35. Skjerven HO, Megremis S, Papadopoulos NG, et al. Virus type and genomic load in acute  
31  
32 bronchiolitis: severity and treatment response with inhaled adrenaline. *J Infect Dis*  
33  
34 2016;213:915-21.  
35  
36 36. Wishaupt JO, van der Ploeg T, de Groot R, et al. Single- and multiple viral respiratory  
37  
38 infections in children: disease and management cannot be related to a specific pathogen.  
39  
40 *BMC Infect Dis* 2017;17:62.  
41  
42  
43  
44  
45  
46  
47  
48  
49  
50  
51  
52  
53  
54  
55  
56  
57  
58  
59  
60

**Table 1. Demographics and clinical features of children treated for acute bronchiolitis in primary care and at hospital in Oslo, Norway, before and after introduction of new treatment guidelines in 2013**

|                                                 | Primary care <sup>b</sup> |                        |                        | Hospital <sup>b</sup>  |                        |                        |
|-------------------------------------------------|---------------------------|------------------------|------------------------|------------------------|------------------------|------------------------|
|                                                 | 2009<br><i>n</i> = 242    | 2014<br><i>n</i> = 239 | 2017<br><i>n</i> = 199 | 2009<br><i>n</i> = 435 | 2014<br><i>n</i> = 374 | 2017<br><i>n</i> = 386 |
| <b>Gender</b>                                   |                           |                        |                        |                        |                        |                        |
| Girls ( <i>n</i> (%))                           | 99 (41.0)                 | 91 (38.1)              | 76 (38.2)              | 180 (41.4)             | 142 (38.0)             | 145 (37.6)             |
| Boys ( <i>n</i> (%))                            | 143 (59.0)                | 148 (61.9)             | 123 (61.8)             | 255 (58.6)             | 232 (62.0)             | 241 (62.4)             |
| <b>Age</b> (months, mean ± SD)                  | 6.4 ± 3.3                 | 6.2 ± 3.4              | 5.7 ± 3.3              | 4.9 ± 3.1              | 5.0 ± 3.4              | 4.6 ± 3.2              |
| <b>Heart rate</b> (per minute, mean ± SD)       | 152.6 ± 22.3              | 151.5 ± 37.4           | 155.0 ± 21.0           | 147.7 ± 19.4           | 148.1 ± 21.6           | 151.4 ± 19.1**         |
| <b>Respiratory rate</b> (per minute, mean ± SD) | 50.0 ± 12.0               | 49.2 ± 11.7            | 51.9 ± 11.3            | 50.7 ± 11.4            | 50.0 ± 11.1            | 48.4 ± 10.4*           |
| <b>Oxygen saturation</b> (% , mean ± SD)        | 96.5 ± 3.0                | 96.0 ± 5.0             | 96.4 ± 2.8             | 97.1 ± 3               | 96.8 ± 3.9             | 97.1 ± 2.7             |
| <b>Retractions</b> ( <i>n</i> (%))              | 126 (52.1)                | 163 (68.2)             | 136 (68.3)*            | 253 (58.2)             | 197 (52.7)             | 237 (61.4)*            |
| <b>Cyanosis</b> ( <i>n</i> (%))                 | 2 (0.8)                   | 2 (0.8)                | 3 (1.5)                | 4 (0.9)                | 4 (1.1)                | 4 (1.0)                |
| <b>Temperature</b> (°C, mean ± SD)              | 37.5 ± 0.9                | 37.4 ± 0.9             | 37.4 ± 0.9             | 37.7 ± 0.8             | 37.6 ± 0.8             | 37.5 ± 0.8*            |
| <b>CRP</b> (mg/L, median (IQR)) <sup>a</sup>    | 10 (5–14)                 | 6 (5–18.5)             | 5 (5–11.5)**           | 7.0 (1.5–17.6)         | 7.8 (1.7–20.6)         | 7.0 (1.4–18)           |

Comparisons were done across all three years at each setting: \**p* < 0.05, \*\**p* < 0.01, \*\*\**p* < 0.001.

<sup>a</sup>CRP test used in primary care setting did not specify values < 5 mg/L. Values <5 mg/L are set as 5

<sup>b</sup>Except for two statistically significant changes in vital signs among the hospital patients; a rise in heart rate from 2009 to 2017; 147.7 ± 19.4 to 151.4 ± 19.1 (*p* < 0.01), and a fall in respiratory rate in the same time period; 50.7 ± 11.4 to 48.4 ± 10.4 (*p* < 0.05), there were no significant differences in vital signs or symptoms between the patient populations in the two settings, nor across the years at each setting.

CRP: C-reactive protein; IQR: interquartile range; SD: standard deviation.

**Table 2. Management of children with acute bronchiolitis in primary care and at hospital in Oslo, Norway, before and after introduction of new treatment guidelines in 2013**

|                                                         | Primary care           |                        |                        | Hospital               |                        |                        |
|---------------------------------------------------------|------------------------|------------------------|------------------------|------------------------|------------------------|------------------------|
|                                                         | 2009<br><i>n</i> = 242 | 2014<br><i>n</i> = 239 | 2017<br><i>n</i> = 199 | 2009<br><i>n</i> = 435 | 2014<br><i>n</i> = 374 | 2017<br><i>n</i> = 386 |
| <b>Nebulized racemic adrenaline (<i>n</i> (%))</b>      | 162 (66.9)             | 134 (56.1)             | 32 (16.1)***           | 257 (59.1)             | 50 (13.4)              | 19 (4.9)***            |
| <b>Nebulized saline (<i>n</i> (%))</b>                  | 2 (0.8)                | 52 (21.8)              | 107 (53.8)***          | 171 (39.3)             | 278 (74.3)             | 252 (65.3)***          |
| <b>Nebulized salbutamol (<i>n</i> (%))</b>              | 5 (2.1)                | 9 (3.8)                | 4 (2.0)                | 63 (14.5)              | 36 (9.6)               | 25 (6.5)**             |
| <b>Oxygen supplement (<i>n</i> (%))</b>                 | 5 (2.1)                | 4 (1.7)                | 4 (2.0)                | 43 (9.9)               | 86 (23.0)              | 75 (19.4)***           |
| <b>Betamethasone (<i>n</i> (%))</b>                     | 16 (6.6)               | 13 (5.4)               | 9 (4.5)                | 29 (6.7)               | 16 (4.3)               | 14 (3.6)               |
| <b>Antipyretics (<i>n</i> (%))</b>                      | 7 (2.9)                | 20 (8.4)               | 5 (2.5)**              | 27 (6.2)               | 34 (9.1)               | 50 (13.0)***           |
| <b>Chest X-ray (<i>n</i> (%))</b>                       | 10 (4.1)               | 0 (0.0)                | 0 (0.0)***             | 135 (31.0)             | 67 (17.9)              | 74 (19.2)***           |
| <b>Referral to hospital (<i>n</i> (%))</b>              | 93 (38.4)              | 107 (44.8)             | 79 (39.7)              | Not applicable         |                        |                        |
| <b>Hospitalization days (<i>mean</i> ± <i>SD</i>)</b>   |                        |                        |                        | 2.7 ± 3.8              | 2.7 ± 3.0              | 2.2 ± 2.4              |
| <b>Hospitalized less than 24 hours (<i>n</i> (%))</b>   |                        |                        |                        | 217 (49.9)             | 197 (52.7)             | 237 (61.4)**           |
| <b>Highflow nasal oxygen (<i>n</i> (%))</b>             |                        |                        |                        | 0 (0.0)                | 20 (5.3)               | 38 (9.8)***            |
| <b>CPAP/BPAP (<i>n</i> (%))</b>                         |                        |                        |                        | 19 (4.4)               | 27 (7.2)               | 23 (6.0)               |
| <b>Respirator/mechanical ventilation (<i>n</i> (%))</b> | Not applicable         |                        |                        | 6 (1.4)                | 7 (1.9)                | 7 (1.8)                |
| <b>Nasogastric tube (<i>n</i> (%))</b>                  |                        |                        |                        | 40 (9.2)               | 43 (11.5)              | 56 (14.5)              |
| <b>Microbiological nasopharyngeal testing</b>           |                        |                        |                        | 303 (69.7)             | 278 (74.3)             | 286 (74.1)             |
| <b>Antibiotics in hospital (<i>n</i> (%))</b>           |                        |                        |                        | 8 (1.9)                | 10 (2.7)               | 16 (4.3)               |
| <b>Antibiotics home treatment (<i>n</i> (%))</b>        | 4 (1.7)                | 1 (0.4)                | 1 (0.5)                | 20 (4.6)               | 6 (1.6)                | 11 (2.8)*              |
| <b>Nebulization home-treatment (<i>n</i> (%))</b>       | Not applicable         |                        |                        | 227 (52.2)             | 231 (61.8)             | 238 (61.7)**           |
| <b>Recontact within 48 hours (<i>n</i> (%))</b>         | 39 (16.1)              | 35 (14.6)              | 32 (16.1)              | 37 (8.5)               | 39 (10.4)              | 50 (13.0)              |

Comparisons were done across all three years at each setting: \**p* < 0.05, \*\**p* < 0.01, \*\*\**p* < 0.001.

BPAP: Bilevel positive airway pressure; CPAP: continuous positive airway pressure; SD: standard deviation.

**Table 3 – Microbiological results from nasopharynx swabs in children with acute bronchiolitis treated at hospital in Oslo, Norway, before and after introduction of new treatment guidelines in 2013**

|                                          | <b>2009</b>            | <b>2014</b>    | <b>2017</b>    |
|------------------------------------------|------------------------|----------------|----------------|
|                                          | <i>n</i> = 303         | <i>n</i> = 278 | <i>n</i> = 286 |
| <b>RS-virus (<i>n</i> (%))</b>           | 181 (59.7)             | 206 (74.1)     | 214 (74.8)     |
| <b>Rhinovirus (<i>n</i> (%))</b>         | <sup>a</sup>           | 126 (45.3)     | 117 (40.9)     |
| <b>Other viruses (<i>n</i> (%))</b>      | 63 (20.8)              | 78 (28.1)      | 73 (25.5)      |
| <b>Bacteria (<i>n</i> (%))</b>           | 5 (1.7)                | 0 (0.0)        | 4 (1.4)        |
| <b>Two or more agents (<i>n</i> (%))</b> | 11 (3.6) <sup>a</sup>  | 79 (28.4)      | 56 (19.6)      |
| <b>Negative results (<i>n</i> (%))</b>   | 87 (28.7) <sup>a</sup> | 16 (5.8)       | 12 (4.2)       |

<sup>a</sup>Rhinovirus was not tested for in 2009.

RS-virus: Respiratory syncytial virus.

# BMJ Paediatrics Open

## **Treatment for acute bronchiolitis before and after implementation of new national guidelines: a retrospective observational study from primary and secondary care in Oslo, Norway**

|                               |                                                                                                                                                                                                                                                                                                                                  |
|-------------------------------|----------------------------------------------------------------------------------------------------------------------------------------------------------------------------------------------------------------------------------------------------------------------------------------------------------------------------------|
| Journal:                      | <i>BMJ Paediatrics Open</i>                                                                                                                                                                                                                                                                                                      |
| Manuscript ID                 | bmjpo-2021-001111.R1                                                                                                                                                                                                                                                                                                             |
| Article Type:                 | Original research                                                                                                                                                                                                                                                                                                                |
| Date Submitted by the Author: | 30-Apr-2021                                                                                                                                                                                                                                                                                                                      |
| Complete List of Authors:     | Klem, Nicolai; University of Oslo, Department of General Practice Skjerven, Håvard Ove; Oslo University Hospital<br>Nilsen, Beate; Oslo Accident and Emergency Outpatient Clinic<br>Brekke, Mette; University of Oslo, Department of General Practice Vallersnes, Odd Martin; University of Oslo, Department of General Practice |
| Keywords:                     | Health services research, Virology, Therapeutics                                                                                                                                                                                                                                                                                 |
|                               |                                                                                                                                                                                                                                                                                                                                  |

SCHOLARONE™  
Manuscripts





I, the Submitting Author has the right to grant and does grant on behalf of all authors of the Work (as defined in the below author licence), an exclusive licence and/or a non-exclusive licence for contributions from authors who are: i) UK Crown employees; ii) where BMJ has agreed a CC-BY licence shall apply, and/or iii) in accordance with the terms applicable for US Federal Government officers or employees acting as part of their official duties; on a worldwide, perpetual, irrevocable, royalty-free basis to BMJ Publishing Group Ltd ("BMJ") its licensees and where the relevant Journal is co-owned by BMJ to the co-owners of the Journal, to publish the Work in this journal and any other BMJ products and to exploit all rights, as set out in our [licence](#).

The Submitting Author accepts and understands that any supply made under these terms is made by BMJ to the Submitting Author unless you are acting as an employee on behalf of your employer or a postgraduate student of an affiliated institution which is paying any applicable article publishing charge ("APC") for Open Access articles. Where the Submitting Author wishes to make the Work available on an Open Access basis (and intends to pay the relevant APC), the terms of reuse of such Open Access shall be governed by a Creative Commons licence – details of these licences and which [Creative Commons](#) licence will apply to this Work are set out in our licence referred to above.

Other than as permitted in any relevant BMJ Author's Self Archiving Policies, I confirm this Work has not been accepted for publication elsewhere, is not being considered for publication elsewhere and does not duplicate material already published. I confirm all authors consent to publication of this Work and authorise the granting of this licence.

1  
2  
3 **Treatment for acute bronchiolitis before and after**  
4  
5  
6 **implementation of new national guidelines: a retrospective**  
7  
8  
9 **observational study from primary and secondary care in Oslo,**  
10  
11  
12 **Norway**

13  
14  
15  
16  
17  
18  
19  
20  
21 Nicolai Klem<sup>1,2</sup>, Håvard Ove Skjerven<sup>3</sup>, Beate Nilsen<sup>1</sup>, Mette Brekke<sup>4</sup>, Odd Martin  
22  
23 Vallersnes<sup>1,2</sup>  
24  
25

26  
27 **Affiliations:**

- 28  
29  
30 1. Oslo Accident and Emergency Outpatient Clinic, Department of Emergency General  
31  
32 Practice, City of Oslo Health Agency, Oslo, Norway  
33  
34 2. Department of General Practice, University of Oslo, Oslo, Norway  
35  
36 3. Department of Paediatrics, Oslo University Hospital, Oslo, Norway  
37  
38 4. General Practice Research Unit, University of Oslo, Oslo, Norway  
39  
40  
41  
42  
43  
44

45 **Address of correspondence to:**

46 Nicolai Klem, MD.

47  
48  
49 Oslo Accident and Emergency Outpatient Clinic, Department of Emergency General Practice,  
50  
51 City of Oslo Health Agency, Oslo, Norway

52  
53 Falbesgate 18D, 0170 Oslo

54  
55  
56 E-mail: [nicolaiklem@gmail.com](mailto:nicolaiklem@gmail.com), +47 92296568.  
57  
58  
59  
60

1  
2  
3  
4  
5 **Word count:** 2395  
6  
7  
8  
9

10 **What is known about the subject**  
11

- 12
- 13 • Treatment guidelines for acute bronchiolitis no longer recommend the use of  
14 nebulized adrenaline  
15
  - 16 • Guidelines, often made by hospital specialists for hospital care, are often perceived not  
17 to fit the primary care population  
18  
19  
20  
21  
22  
23  
24  
25

26 **What this study adds**  
27

- 28
- 29 • The successful implementation of a new treatment guideline for acute bronchiolitis,  
30 reduced the use of nebulized adrenaline both in primary and secondary care  
31
  - 32 • An inverse rise in the use of nebulized saline was seen in both settings, though not  
33 specifically recommended  
34  
35
  - 36 • Use of antibiotics remained low  
37  
38  
39  
40  
41  
42  
43  
44  
45  
46  
47  
48  
49  
50  
51  
52  
53  
54  
55  
56  
57  
58  
59  
60

## ABSTRACT

**Background:** Acute bronchiolitis treatment guidelines changed in Norway in 2013, no longer recommending the use of nebulized adrenaline. We aimed to assess whether these changes were successfully implemented in both primary and secondary care. Secondary aims were to compare the difference in management of acute bronchiolitis patients in primary and secondary care between 2009 and 2017.

**Methods:** We retrospectively registered data on demographics, clinical features and management from electronic medical records of all infants (<12 months of age) diagnosed with acute bronchiolitis at a primary care centre (Oslo Accident and Emergency Outpatient Clinic) and a secondary care centre (Oslo University Hospital) in Norway in 2009, 2014, and 2017. All patient records were individually reviewed to ensure data accuracy.

**Results:** We included 680 (36.3%) patients from primary care and 1195 (63.7%) from secondary care. There was a reduction in the use of nebulized adrenaline from 2009 to 2017 from 66.9% to 16.1% of cases ( $p<0.001$ ) in primary care and from 59.1 % to 4.9 % ( $p<0.001$ ) in secondary care. In parallel, there was an increase in the use of nebulized saline treatment, from 0.8% to 53.8% ( $p<0.001$ ) in primary care and from 39.3% to 65.3% ( $p<0.001$ ) in secondary care. The decrease in the use of nebulized racemic adrenaline occurred earlier in secondary care than in primary care; 13.4 % vs 56.1%, respectively, in 2014.

**Conclusions:** Implementation of the new guidelines on the treatment of acute bronchiolitis were successfully implemented in both primary and secondary care.

**Key words:** Compliance, treatment guidelines, bronchiolitis, nebulizer treatment, racemic adrenaline, saline, RS-virus, antibiotic treatment, primary vs secondary care

## INTRODUCTION

Bronchiolitis is an acute viral lower respiratory tract infection affecting infants below one year of age.(1) Multiple treatment options have been recommended and used throughout different regions and time periods, including nebulized beta-2-agonists, nebulized racemic adrenaline, systemic corticosteroids, antibiotics, and nebulized hypertonic saline.(1-4) Mecklin et al. showed that all of these options were used in infants below 12 months of age with bronchiolitis between 2000 and 2015 in Tampere, Finland, with an increasing use of nebulized hypertonic saline.(5) In 2013, nebulized racemic adrenaline was removed from the Norwegian national acute bronchiolitis treatment guidelines(6) as a consequence of the Bronchiolitis All-Study SE Norway that found no difference in patient outcomes in children given nebulized racemic adrenaline vs. children given nebulized saline.(2) In general, recently published guidelines from different regions recommend supportive care only and a minimal handling strategy in the treatment for acute bronchiolitis patients.(7-10)

Adherence to clinical guidelines in general practice has room for improvements.(11) One plausible explanation is that guidelines are often made by secondary care specialists for specific conditions that do not necessarily fit the primary care population.(12) The Norwegian guidelines for acute bronchiolitis are made by paediatricians for secondary care, but parts of the guidelines have been used also in Norwegian primary care.(6) To the best of our knowledge, no studies have compared how the same changes in a clinical guideline have been implemented in both primary and secondary care.

## Aims

The primary aim of the study was to determine whether the new national treatment guidelines for acute bronchiolitis in Norway, published in 2013, were implemented in primary and secondary care. Secondary aims were to compare the difference in management of acute bronchiolitis patients in primary and secondary care between 2009 and 2017.

## METHODS

### Study design

A retrospective observational study of children < 12 months of age presenting with acute bronchiolitis at the Oslo Accident and Emergency Outpatient Clinic (OAEOC) or at the Oslo University Hospital, Division of Paediatric and Adolescent Medicine (OUH), in Oslo, Norway, in 2009, 2014, and 2017.

### Settings

The Norwegian healthcare system is two-tiered, with primary care holding a gate-keeping function for secondary care. Unless triaged directly for hospital treatment by the ambulance service, patients at all ages are assessed in primary care, usually by local family physicians during office hours, or at primary care emergency outpatient clinics at weekends and nights. If the primary care doctor decides that the patient needs secondary care, the patient is transferred to hospital.

In Oslo, the main primary care emergency clinic is the OAEOC, open 24 hours a day, 365 days a year. Diagnostic and treatment resources include chest X-rays, point-of-care blood tests, and nebulizer treatment. Oslo is the capital city of Norway and had 666 759 inhabitants

1  
2  
3 as per 1.1.2017.(13) The paediatric population (children < 18 years of age) in the OAEOC  
4  
5 catchment area was 137 233 as per 1.1.2017, while the OUH catchment area, covering 12 of  
6  
7 15 city districts, encompassed 110 958.(13)  
8  
9

## 10 11 12 **Participants**

13  
14 We included all patients below the age of 12 months diagnosed with bronchiolitis at the  
15  
16 OAEOC or the OUH from the 1<sup>st</sup> of January to the 31<sup>st</sup> of December of the three years 2009,  
17  
18 2014, and 2017.  
19  
20  
21

22  
23 At the OAEOC, eligible patients were identified from the patient registration lists in the  
24  
25 electronic medical records. If the triage nurse had described airway illness, or symptoms  
26  
27 associated with airway illness, as the presenting complaint in a child below the age of 12  
28  
29 months, the case notes were reviewed by study personnel and the patient included if given a  
30  
31 bronchiolitis diagnosis (R78 in the International Classification of Primary Care, 2<sup>nd</sup> edition  
32  
33 (ICPC-2))(14) or treated for bronchiolitis with relevant bronchiolitis symptoms noted. At the  
34  
35 OUH, all contacts involving patients below the age of 12 months with a diagnosis of  
36  
37 bronchiolitis (J21 in the International Classification of Diseases and Related Health Problems  
38  
39 (ICD-10))(15) were identified through an electronic search in the medical records. Electronic  
40  
41 patient records for each acute admission were reviewed. In both settings, patients were  
42  
43 included case by case, while planned follow-up contacts were excluded. Hence, one patient  
44  
45 could be included several times as different cases.  
46  
47  
48  
49  
50  
51

52  
53 We reviewed 5233 patient records at the OAEOC and 1520 at the OUH, yielding 680  
54  
55 included cases from the OAEOC and 1195 from the OUH.  
56  
57  
58  
59  
60

## Variables

We registered demographic data (gender, age), vital signs (heart rate, oxygen saturation, respiratory rate, temperature), and clinical signs of respiratory distress (retractions, cyanosis). Furthermore, we registered treatment given, including nebulized medication (racemic adrenaline, saline, salbutamol), oxygen, high-flow nasal oxygen, ventilatory support (continuous positive airway pressure (CPAP), bilevel positive airway pressure (BPAP), respirator), nasogastric tube feeding, antipyretics, steroids, and antibiotics. Supplementary investigations were also registered, including C-reactive protein (CRP), nasopharyngeal swabs for virus and atypical bacterial agents, and chest X-rays. At the OAEOC, a CRP point-of-care test was used, not measuring values  $< 5$  mg/L, while the OUH used a laboratory CRP test. Finally, we registered length of stay, whether the patient was transferred to hospital from the OAEOC, whether nebulizer home treatment was initiated, and whether the patient re-presented to the clinic within 48 hours.

## Statistical methods

All data were analysed in IBM SPSS version 26 (IBM Corp., Chicago, IL). Pearson's chi-square test was used to compare frequencies. For continuous data, one-way analysis of variance (ANOVA) was used. Kruskal-Wallis test was used for the CRP data, which did not follow the normal distribution. The significance level was set to 5 percent. Imputation for missing data was not performed.

## Ethics

The study was a quality improvement study, as per the Norwegian Law on Health Personnel §26, retrospectively collecting anonymous data already registered in patient records.

Accordingly, the need for approval from an ethics committee was waived, as was the need to



1  
2  
3 obtain consent to participate. The study was approved by the Oslo University Hospital  
4  
5 Information Security and Privacy Office, and by the director of the Department of Emergency  
6  
7 General Practice at the City of Oslo Health Agency.  
8  
9  
10

## 11 12 13 14 **RESULTS**

15  
16 We included 680 cases from primary care and 1195 cases from secondary care. Mean age was  
17  
18 higher in primary care than in secondary care, 6.1 months versus 4.8 months ( $p < 0.001$ ). The  
19  
20 gender distribution was similar, with 60.9 % boys in both settings. Clinical characteristics are  
21  
22 shown in table 1.  
23  
24  
25

26  
27  
28 There was a reduction in the use of nebulized racemic adrenaline treatment from 2009 to  
29  
30 2017; from 66.9 % (162/242) of cases to 16.1 % (32/199) ( $p < 0.001$ ) in primary care and  
31  
32 from 59.1 % (257/435) to 4.9 % (19/386) ( $p < 0.001$ ) in secondary care (table 2).  
33  
34

35  
36 Simultaneously, there was an increase in the use of nebulized saline treatment; from 0.8 %  
37  
38 (2/242) to 53.8 % (107/199) ( $p < 0.001$ ) in primary care and from 39.3 % (171/435) to 65.3 %  
39  
40 (252/386) ( $p < 0.001$ ) in secondary care. The decrease in the use of nebulized racemic  
41  
42 adrenaline occurred earlier in secondary care (13.4 % (50/374) in 2014) than in primary care  
43  
44 (56.1 % (134/239) in 2014).  
45  
46  
47

48  
49 In secondary care, there was also a reduction from 2009 to 2017 in the use of nebulized  
50  
51 salbutamol from 14.5 % (63/435) of cases to 6.5 % (25/386) ( $p = 0.001$ ), an increase in the  
52  
53 use of oxygen supplement from 9.9 % (43/435) to 19.4 % (75/386) ( $p < 0.001$ ), and of  
54  
55 antipyretics from 6.2 % (27/435) to 13.0 % (50/386) ( $p = 0.004$ ) (table 2). In-hospital  
56  
57 antibiotic use was low throughout the study period; 1.9 % in 2009, 2.7 % in 2014 and 4.3 %  
58  
59  
60

1  
2  
3 in 2017 ( $p = 0.136$ ). Antibiotic home-treatment initiated from the hospital was reduced from  
4  
5 4.6 % (20/435) to 2.8 % (11/386) ( $p = 0.047$ ).  
6  
7

8  
9  
10 Furthermore, there was a decrease in the use of chest X-ray as a diagnostic tool, from 4.1 %  
11  
12 (10/242) to none ( $p < 0.001$ ) in primary care and from 31.0 % (135/435) to 19.2 % (74/386)  
13  
14 ( $p < 0.001$ ) in secondary care (table 2). At the hospital, microbiological tests were performed  
15  
16 in 72.6 % (867/1195) of the children. RS-virus was the main agent throughout, found in 69.3  
17  
18 % (601/867) of the samples (table 3).  
19  
20  
21  
22  
23  
24  
25

## 26 **DISCUSSION**

27  
28 In accordance with the guidelines published in 2013, the use of nebulized racemic adrenaline  
29  
30 was substantially reduced from 2009 to 2017 in both primary and secondary care. The change  
31  
32 occurred earlier (2014) in secondary than in primary care. In the same period, the use of  
33  
34 nebulized saline increased and antibiotics decreased in both settings. In hospital, the use of  
35  
36 oxygen and antipyretics increased.  
37  
38  
39  
40  
41

42 The new treatment guidelines were implemented already in 2014 in secondary care and well  
43  
44 implemented in primary care in 2017. One can argue that this was fairly successful, as  
45  
46 implementation of guidelines are known to take time.(16, 17) Our results show slower  
47  
48 adaption to the guidelines in primary care than in secondary care. There is research suggesting  
49  
50 lower adherence to guidelines in primary care,(11) which would support our findings. Primary  
51  
52 care physicians experience several barriers for adherence to guidelines, where lack of  
53  
54 awareness and lack of familiarity are the two most commonly reported.(18, 19) As physicians  
55  
56 in primary care manage patients of all ages with a wide spectrum of illnesses, the  
57  
58  
59  
60

1  
2  
3 implementation of guidelines for specific illnesses might not get general attention.(12) The  
4  
5 Bronchiolitis All-Study SE was conducted at the OUH previously to the guideline  
6  
7 implementation, directly involving most doctors and nurses attending the acute ward.(2, 20)  
8  
9  
10 This would suggest a higher awareness and familiarity to the new guidelines at the hospital,  
11  
12 leading to faster adaptation. We consider full time employees and internal education programs  
13  
14 at both clinics crucial for successful implementation.  
15  
16  
17  
18

19  
20 Apart from the primary care delay in implementing the new guidelines, we found similar  
21  
22 changes in the initial treatment of patients with acute bronchiolitis in primary and secondary  
23  
24 care. The increase in nebulized saline use is not evidence based and not recommended by  
25  
26 national guidelines. Overtreatment is an acknowledged challenge in medicine,(21) and there  
27  
28 is a possibility that the increasing use of nebulized saline is a consequence of the urge of  
29  
30 health care personnel to do something, by providing any specific therapy rather than what is  
31  
32 evidence based management.  
33  
34  
35  
36  
37

38  
39 The reduction in the use of nebulized beta-2-agonists is supported by new guidelines and  
40  
41 research,(2, 9, 22-25) and is a focus across the world.(24, 25) Antibiotic treatment is not  
42  
43 recommended for acute bronchiolitis,(9, 26, 27) and overuse is a known problem.(28-30) Our  
44  
45 results showed a very low use of antibiotics, consistently below 5 %, compared to other  
46  
47 countries, where rates in the range of 3.5–11.1 % are reported.(28)  
48  
49  
50

51  
52 We found a steady rise in the use of highflow oxygen in the hospital setting. Recent research  
53  
54 has not clearly shown that this is beneficial for acute bronchiolitis treatment.(31, 32) Hospital  
55  
56 length of stay did not change during the study time period. However, there was an increase in  
57  
58  
59  
60

1  
2  
3 the proportion of patients discharged within 24 hours, from 49.9 % to 61.4 %, signifying that  
4 a majority of hospital bronchiolitis patients only need a short period of supportive care.  
5  
6  
7  
8  
9

10 No more than 40 % of the bronchiolitis patients at the OAEOC were sent on to secondary  
11 care. This contribution to reducing hospital emergency department crowding is an advantage  
12 of a gate keeping primary care emergency health service. The availability of nebulizer  
13 treatment and short-term observation gives the OAEOC the capacity to treat and observe  
14 children with a wide variety of airway symptoms, and hence better to identify the patients in  
15 need of hospital treatment.  
16  
17  
18  
19  
20  
21  
22  
23  
24  
25

26 The main agent causing bronchiolitis is known to be RS-virus,(33, 34) as was the case in our  
27 study, with Rhinovirus the second most common agent. Two or more agents were found in  
28 more than one out of four children, less frequently than the 61% co-infections found by  
29 Skjerven et al. in their review from 2016.(35) A relationship between viral findings and the  
30 severity of respiratory disease in infants with acute bronchiolitis has not been established,  
31 though it has been suggested that high genomic load can lead to longer hospital stay and more  
32 use of oxygen and ventilatory support.(35, 36)  
33  
34  
35  
36  
37  
38  
39  
40  
41  
42  
43  
44

#### 45 **Strengths and limitations**

46 Our study included a large patient population from both primary and secondary care.  
47 Encompassing the two largest emergency departments for children in Oslo, our study  
48 population is representative of the city population. Though patients were not included if  
49 managed at other smaller primary care clinics, or referred by them or the ambulance service  
50 directly to the neighbouring paediatric hospital covering the remaining 3 of 15 city districts,  
51 this number is probably small and the population is most likely similar to ours. We therefore  
52  
53  
54  
55  
56  
57  
58  
59  
60

1  
2  
3 consider our results to be representative for the population of children with acute bronchiolitis  
4  
5 needing primary and/or hospital care in Norway.  
6  
7  
8  
9

10 The medical journal of every study subject was thoroughly examined by the first author,  
11 ensuring as complete and accurate data as possible. Clinical signs, diagnostic investigations,  
12 or treatments not mentioned in the patient records were considered not present or not  
13 performed. This may have resulted in some underreporting, though not enough to have an  
14 impact on our conclusions.  
15  
16  
17  
18  
19  
20  
21  
22

23 Eligible patients were found retrospectively, and we sought to limit selection bias by having  
24 clear and strict inclusion criteria. Still, some interpretation was necessary in the primary care  
25 setting in cases where bronchiolitis had not been set as the main diagnosis and the patient was  
26 included based on the case notes. Only the first author reviewed the patient records. This  
27 secured a more consistent inclusion of patients, but at the same time carried the risk of  
28 increased selection bias.  
29  
30  
31  
32  
33  
34  
35  
36  
37  
38  
39

40 Since the inclusion of some patients was based on strict criteria from case notes, we may have  
41 missed some patients in the primary care group receiving ICPC-2 symptoms diagnoses rather  
42 than the specific diagnosis of acute bronchiolitis. However, the patient records of all  
43 individuals with related symptom diagnoses was manually screened to identify signs and  
44 symptoms in order to identify acute bronchiolitis. This may also partly explain why the  
45 number of included patients was lower at the OAEOC than the OUH. Furthermore, the  
46 ambulance service brings severely sick patients directly to hospital, hence bypassing the  
47  
48  
49  
50  
51  
52  
53  
54  
55  
56  
57  
58  
59  
60  
61  
62  
63  
64  
65  
66  
67  
68  
69  
70  
71  
72  
73  
74  
75  
76  
77  
78  
79  
80  
81  
82  
83  
84  
85  
86  
87  
88  
89  
90  
91  
92  
93  
94  
95  
96  
97  
98  
99  
100  
101  
102  
103  
104  
105  
106  
107  
108  
109  
110  
111  
112  
113  
114  
115  
116  
117  
118  
119  
120  
121  
122  
123  
124  
125  
126  
127  
128  
129  
130  
131  
132  
133  
134  
135  
136  
137  
138  
139  
140  
141  
142  
143  
144  
145  
146  
147  
148  
149  
150  
151  
152  
153  
154  
155  
156  
157  
158  
159  
160  
161  
162  
163  
164  
165  
166  
167  
168  
169  
170  
171  
172  
173  
174  
175  
176  
177  
178  
179  
180  
181  
182  
183  
184  
185  
186  
187  
188  
189  
190  
191  
192  
193  
194  
195  
196  
197  
198  
199  
200  
201  
202  
203  
204  
205  
206  
207  
208  
209  
210  
211  
212  
213  
214  
215  
216  
217  
218  
219  
220  
221  
222  
223  
224  
225  
226  
227  
228  
229  
230  
231  
232  
233  
234  
235  
236  
237  
238  
239  
240  
241  
242  
243  
244  
245  
246  
247  
248  
249  
250  
251  
252  
253  
254  
255  
256  
257  
258  
259  
260  
261  
262  
263  
264  
265  
266  
267  
268  
269  
270  
271  
272  
273  
274  
275  
276  
277  
278  
279  
280  
281  
282  
283  
284  
285  
286  
287  
288  
289  
290  
291  
292  
293  
294  
295  
296  
297  
298  
299  
300  
301  
302  
303  
304  
305  
306  
307  
308  
309  
310  
311  
312  
313  
314  
315  
316  
317  
318  
319  
320  
321  
322  
323  
324  
325  
326  
327  
328  
329  
330  
331  
332  
333  
334  
335  
336  
337  
338  
339  
340  
341  
342  
343  
344  
345  
346  
347  
348  
349  
350  
351  
352  
353  
354  
355  
356  
357  
358  
359  
360  
361  
362  
363  
364  
365  
366  
367  
368  
369  
370  
371  
372  
373  
374  
375  
376  
377  
378  
379  
380  
381  
382  
383  
384  
385  
386  
387  
388  
389  
390  
391  
392  
393  
394  
395  
396  
397  
398  
399  
400  
401  
402  
403  
404  
405  
406  
407  
408  
409  
410  
411  
412  
413  
414  
415  
416  
417  
418  
419  
420  
421  
422  
423  
424  
425  
426  
427  
428  
429  
430  
431  
432  
433  
434  
435  
436  
437  
438  
439  
440  
441  
442  
443  
444  
445  
446  
447  
448  
449  
450  
451  
452  
453  
454  
455  
456  
457  
458  
459  
460  
461  
462  
463  
464  
465  
466  
467  
468  
469  
470  
471  
472  
473  
474  
475  
476  
477  
478  
479  
480  
481  
482  
483  
484  
485  
486  
487  
488  
489  
490  
491  
492  
493  
494  
495  
496  
497  
498  
499  
500  
501  
502  
503  
504  
505  
506  
507  
508  
509  
510  
511  
512  
513  
514  
515  
516  
517  
518  
519  
520  
521  
522  
523  
524  
525  
526  
527  
528  
529  
530  
531  
532  
533  
534  
535  
536  
537  
538  
539  
540  
541  
542  
543  
544  
545  
546  
547  
548  
549  
550  
551  
552  
553  
554  
555  
556  
557  
558  
559  
560  
561  
562  
563  
564  
565  
566  
567  
568  
569  
570  
571  
572  
573  
574  
575  
576  
577  
578  
579  
580  
581  
582  
583  
584  
585  
586  
587  
588  
589  
590  
591  
592  
593  
594  
595  
596  
597  
598  
599  
600  
601  
602  
603  
604  
605  
606  
607  
608  
609  
610  
611  
612  
613  
614  
615  
616  
617  
618  
619  
620  
621  
622  
623  
624  
625  
626  
627  
628  
629  
630  
631  
632  
633  
634  
635  
636  
637  
638  
639  
640  
641  
642  
643  
644  
645  
646  
647  
648  
649  
650  
651  
652  
653  
654  
655  
656  
657  
658  
659  
660  
661  
662  
663  
664  
665  
666  
667  
668  
669  
670  
671  
672  
673  
674  
675  
676  
677  
678  
679  
680  
681  
682  
683  
684  
685  
686  
687  
688  
689  
690  
691  
692  
693  
694  
695  
696  
697  
698  
699  
700  
701  
702  
703  
704  
705  
706  
707  
708  
709  
710  
711  
712  
713  
714  
715  
716  
717  
718  
719  
720  
721  
722  
723  
724  
725  
726  
727  
728  
729  
730  
731  
732  
733  
734  
735  
736  
737  
738  
739  
740  
741  
742  
743  
744  
745  
746  
747  
748  
749  
750  
751  
752  
753  
754  
755  
756  
757  
758  
759  
760  
761  
762  
763  
764  
765  
766  
767  
768  
769  
770  
771  
772  
773  
774  
775  
776  
777  
778  
779  
780  
781  
782  
783  
784  
785  
786  
787  
788  
789  
790  
791  
792  
793  
794  
795  
796  
797  
798  
799  
800  
801  
802  
803  
804  
805  
806  
807  
808  
809  
810  
811  
812  
813  
814  
815  
816  
817  
818  
819  
820  
821  
822  
823  
824  
825  
826  
827  
828  
829  
830  
831  
832  
833  
834  
835  
836  
837  
838  
839  
840  
841  
842  
843  
844  
845  
846  
847  
848  
849  
850  
851  
852  
853  
854  
855  
856  
857  
858  
859  
860  
861  
862  
863  
864  
865  
866  
867  
868  
869  
870  
871  
872  
873  
874  
875  
876  
877  
878  
879  
880  
881  
882  
883  
884  
885  
886  
887  
888  
889  
890  
891  
892  
893  
894  
895  
896  
897  
898  
899  
900  
901  
902  
903  
904  
905  
906  
907  
908  
909  
910  
911  
912  
913  
914  
915  
916  
917  
918  
919  
920  
921  
922  
923  
924  
925  
926  
927  
928  
929  
930  
931  
932  
933  
934  
935  
936  
937  
938  
939  
940  
941  
942  
943  
944  
945  
946  
947  
948  
949  
950  
951  
952  
953  
954  
955  
956  
957  
958  
959  
960  
961  
962  
963  
964  
965  
966  
967  
968  
969  
970  
971  
972  
973  
974  
975  
976  
977  
978  
979  
980  
981  
982  
983  
984  
985  
986  
987  
988  
989  
990  
991  
992  
993  
994  
995  
996  
997  
998  
999  
1000

## Conclusion

There was a large and highly significant reduction in the use of nebulized racemic adrenaline treatment after the introduction of new national guidelines in 2013, both in primary and secondary health care. Simultaneously, there was an increase in the use of nebulized saline. Implementation of the new guidelines occurred earlier in the hospital setting than in primary care.

## Acknowledgements

We thank the Department of Microbiology at the Oslo University Hospital for making the microbiological data available to us.

## Funding statement

Dr Klem received a six months scholarship from the Norwegian Committee on Research in General Practice (Allmenntmedisinsk Forskningsutvalg (AFU)), a committee of the Norwegian College of General Practitioners.

## Data sharing statement

Data are currently not available for sharing. Several manuscripts based on the data set are in preparation. Requests concerning the data may be sent to the corresponding author.

## Authors' contributions

NK conceived and designed the study, collected and analysed the data, and drafted and revised the manuscript. HOS, MB, and BN contributed to designing the study and revised the

1  
2  
3 manuscript. OMV contributed to designing the study, revised the manuscript, and supervised  
4 the project.  
5  
6  
7  
8  
9

### 10 **Competing interests:**

11  
12 The authors have no conflicts of interest to disclose.  
13  
14  
15  
16

### 17 **Patient and public involvement**

18  
19 Patients were not involved in designing the study, but will be involved in disseminating the  
20 results to the wider patient community.  
21  
22  
23  
24  
25

### 26 **REFERENCES**

- 27  
28 1. Gadomski AM, Scribani MB. Bronchodilators for bronchiolitis. *Cochrane Database Syst*  
29 *Rev* 2014(6):CD001266.  
30  
31
- 32  
33 2. Skjerven HO, Hunderi JO, Brüggmann-Pieper SK, et al. Racemic adrenaline and inhalation  
34 strategies in acute bronchiolitis. *N Engl J Med* 2013;368:2286-93.  
35  
36
- 37  
38 3. Zorc JJ, Hall CB. Bronchiolitis: recent evidence on diagnosis and management.  
39  
40 *Pediatrics* 2010;125:342-9.  
41
- 42  
43 4. Fernandes RM, Bialy LM, Vandermeer B, et al. Glucocorticoids for acute viral  
44 bronchiolitis in infants and young children. *Cochrane Database Syst Rev*  
45 2013(6):CD004878.  
46  
47
- 48  
49 5. Mecklin M, Heikkila P, Korppi M. The change in management of bronchiolitis in the  
50 intensive care unit between 2000 and 2015. *Eur J Pediatr* 2018;177:1131-7.  
51  
52
- 53  
54 6. Norsk barnelegeforening. Akuttveileder i pediatri.  
55  
56 <http://www.helsebiblioteket.no/retningslinjer/akuttveileder-i-pediatri/forside> (accessed 11  
57  
58 May 2017).  
59  
60

- 1  
2  
3 7. McNaughten B, Hart C, Shields M. Management of bronchiolitis in infants: key clinical  
4 questions. *Paediatr Child Health* 2017;27:324-7.  
5  
6
- 7  
8 8. Everard ML, Hind D, Ugonna K, et al. Saline in acute bronchiolitis RCT and economic  
9 evaluation: hypertonic saline in acute bronchiolitis - randomised controlled trial and  
10 systematic review. *Health Technol Assess* 2015;19:1-130.  
11  
12
- 13  
14 9. Ralston SL, Lieberthal AS, Meissner HC, et al. Clinical practice guideline: the diagnosis,  
15 management, and prevention of bronchiolitis. *Pediatrics* 2014;134:e1474-502.  
16  
17
- 18  
19 10. National Institute of Health and Care Excellence. NICE Guidelines 2015. Bronchiolitis in  
20 children diagnosis and management, 2015. <https://www.nice.org.uk/guidance/ng9>  
21 (accessed 11 May 2017).  
22  
23
- 24  
25 11. Lugtenberg M, Burgers JS, Han D, et al. General practitioners' preferences for  
26 interventions to improve guideline adherence. *J Eval Clin Pract* 2014;20:820-6.  
27  
28
- 29  
30 12. Austad B, Hetlevik I, Mjølstad BP, et al. Applying clinical guidelines in general practice:  
31 a qualitative study of potential complications. *BMC Fam Pract* 2016;17:92.  
32  
33
- 34  
35 13. Oslo Municipality Statistics Database, 2017.  
36  
37 <http://statistikkbanken.oslo.kommune.no/webview/index.jsp?catalog=http%3A%2F%2Fstatistikkbanken.oslo.kommune.no%3A80%2Fobj%2FfCatalog%2FCatalog48&submode=catalog&mode=documentation&top=yes> (accessed 11 Apr 2019).  
38  
39  
40  
41  
42  
43
- 44  
45 14. World Health Organization. International Classification of Primary Care, 2nd ed. (ICPC-  
46 2). Geneva, 2003. <http://www.who.int/classifications/icd/adaptations/icpc2/en/> (accessed  
47 11 May 2019).  
48  
49
- 50  
51 15. World Health Organization. The ICD-10 classification of mental and behavioural  
52 disorders: clinical descriptions and diagnostic guidelines. Geneva, 1992.  
53  
54  
55  
56 <https://www.who.int/classifications/icd/en/bluebook.pdf> (accessed 11 May 2019).  
57  
58  
59  
60



16. Austad B, Hetlevik I, Bugten V, et al. Implementing guidelines for follow-up after surgery with ventilation tube in the tympanic membrane in Norway: a retrospective study. *BMC Ear Nose Throat Disord* 2013;13:5.
17. Aftab RA, Khan AH, Sulaiman SAS, et al. Does guideline knowledge affect treatment compliance among emergency doctors? *Am J Med Sci* 2014;348:357-61.
18. Lugtenberg M, Zegers-van Schaick JM, Westert GP, et al. Why don't physicians adhere to guideline recommendations in practice?: an analysis of barriers among Dutch general practitioners. *Implement Sci* 2009;4:54.
19. Cabana MD, Rand CS, Powe NR, et al. Why don't physicians follow clinical practice guidelines. *JAMA* 1999;282:1458-65.
20. Oymar K, Skjerven HO, Mikalsen IB. Acute bronchiolitis in infants: a review. *Scand J Trauma Resusc Emerg Med* 2014;22:23.
21. Armstrong N. Overdiagnosis and overtreatment as a quality problem: insights from healthcare improvement research. *BMJ Qual Saf* 2018;27:571-5.
22. Hartling L, Fernandes RM, Bialy L, et al. Steroids and bronchodilators for acute bronchiolitis in the first two years of life: systematic review and meta-analysis. *BMJ* 2011;342:d1714.
23. Meissner HC. Viral bronchiolitis in children. *N Engl J Med* 2016;374:62-72.
24. Montejo M, Paniagua N, Saiz-Hernando C, et al. Initiatives to reduce treatments in bronchiolitis in the emergency department and primary care. *Arch Dis Child* 2021;106:294-300.
25. Oakley E, Brys T, Borland M, et al. Medication use in infants admitted with bronchiolitis. *Emerg Med Australas* 2018;30:389-97.
26. Friis B, Andersen P, Brenøe E, et al. Antibiotic treatment of pneumonia and bronchiolitis: a prospective randomised study. *Arch Dis Child* 1984;59:1038-45.

- 1  
2  
3 27. Hall CB, Powell KR, Schnabel KC, et al. Risk of secondary bacterial infection in infants  
4 hospitalized with respiratory syncytial viral infection. *J Pediatr* 1988;113:266-71.  
5  
6  
7  
8 28. Zipursky A, Kuppermann N, Finkelstein Y, et al. International practice patterns of  
9 antibiotic therapy and laboratory testing in bronchiolitis. *Pediatrics* 2020;146:e20193684.  
10  
11  
12 29. Lopez AA, Aslanova R, Bridger N, et al. Antibiotic use for inpatient bronchiolitis: did  
13 national guidelines impact practice at a pediatric hospital? *Hosp Pediatr* 2020;10:147-52.  
14  
15  
16 30. Papenburg J, Fontela PS, Freitas RR, et al. Inappropriate antibiotic prescribing for acute  
17 bronchiolitis in US emergency departments, 2007-2015. *J Pediatric Infect Dis Soc*  
18 2019;8:567-70.  
19  
20  
21  
22 31. Franklin D, Babl FE, Schlapbach LJ, et al. A randomized trial of high-flow oxygen  
23 therapy in infants with bronchiolitis. *N Engl J Med* 2018;378:1121-31.  
24  
25  
26  
27 32. Lin J, Zhang Y, Xiong L, et al. High-flow nasal cannula therapy for children with  
28 bronchiolitis: a systematic review and meta-analysis. *Arch Dis Child* 2019;104:564-76.  
29  
30  
31  
32 33. Miron D, Srugo I, Kra-Oz Z, et al. Sole pathogen in acute bronchiolitis: is there a role for  
33 other organisms apart from respiratory syncytial virus? *Pediatr Infect Dis J* 2010;29:e7-  
34 e10.  
35  
36  
37  
38 34. Carlsen KH, Ørstavik I, Halvorsen K. Viral infections of the respiratory tract in  
39 hospitalized children: a study from Oslo during a 90 months period. *Acta Paediatr Scand*  
40 1983;72:53-8.  
41  
42  
43  
44 35. Skjerven HO, Megremis S, Papadopoulos NG, et al. Virus type and genomic load in acute  
45 bronchiolitis: severity and treatment response with inhaled adrenaline. *J Infect Dis*  
46 2016;213:915-21.  
47  
48  
49  
50 36. Wishaupt JO, van der Ploeg T, de Groot R, et al. Single- and multiple viral respiratory  
51 infections in children: disease and management cannot be related to a specific pathogen.  
52 *BMC Infect Dis* 2017;17:62.  
53  
54  
55  
56  
57  
58  
59  
60

1  
2  
3  
4  
5  
6  
7  
8  
9  
10  
11  
12  
13  
14  
15  
16  
17  
18  
19  
20  
21  
22  
23  
24  
25  
26  
27  
28  
29  
30  
31  
32  
33  
34  
35  
36  
37  
38  
39  
40  
41  
42  
43  
44  
45  
46  
47  
48  
49  
50  
51  
52  
53  
54  
55  
56  
57  
58  
59  
60

Confidential: For Review Only

**Table 1. Demographics and clinical features of children treated for acute bronchiolitis in primary care and at hospital in Oslo, Norway, before and after introduction of new treatment guidelines in 2013**

|                                                 | Primary care <sup>b</sup> |                        |                        | Hospital <sup>b</sup>  |                        |                        |
|-------------------------------------------------|---------------------------|------------------------|------------------------|------------------------|------------------------|------------------------|
|                                                 | 2009<br><i>n</i> = 242    | 2014<br><i>n</i> = 239 | 2017<br><i>n</i> = 199 | 2009<br><i>n</i> = 435 | 2014<br><i>n</i> = 374 | 2017<br><i>n</i> = 386 |
| <b>Gender</b>                                   |                           |                        |                        |                        |                        |                        |
| Girls ( <i>n</i> (%))                           | 99 (41.0)                 | 91 (38.1)              | 76 (38.2)              | 180 (41.4)             | 142 (38.0)             | 145 (37.6)             |
| Boys ( <i>n</i> (%))                            | 143 (59.0)                | 148 (61.9)             | 123 (61.8)             | 255 (58.6)             | 232 (62.0)             | 241 (62.4)             |
| <b>Age</b> (months, mean ± SD)                  | 6.4 ± 3.3                 | 6.2 ± 3.4              | 5.7 ± 3.3              | 4.9 ± 3.1              | 5.0 ± 3.4              | 4.6 ± 3.2              |
| <b>Heart rate</b> (per minute, mean ± SD)       | 152.6 ± 22.3              | 151.5 ± 37.4           | 155.0 ± 21.0           | 147.7 ± 19.4           | 148.1 ± 21.6           | 151.4 ± 19.1**         |
| <b>Respiratory rate</b> (per minute, mean ± SD) | 50.0 ± 12.0               | 49.2 ± 11.7            | 51.9 ± 11.3            | 50.7 ± 11.4            | 50.0 ± 11.1            | 48.4 ± 10.4*           |
| <b>Oxygen saturation</b> (% , mean ± SD)        | 96.5 ± 3.0                | 96.0 ± 5.0             | 96.4 ± 2.8             | 97.1 ± 3               | 96.8 ± 3.9             | 97.1 ± 2.7             |
| <b>Retractions</b> ( <i>n</i> (%))              | 126 (52.1)                | 163 (68.2)             | 136 (68.3)*            | 253 (58.2)             | 197 (52.7)             | 237 (61.4)*            |
| <b>Cyanosis</b> ( <i>n</i> (%))                 | 2 (0.8)                   | 2 (0.8)                | 3 (1.5)                | 4 (0.9)                | 4 (1.1)                | 4 (1.0)                |
| <b>Temperature</b> (°C, mean ± SD)              | 37.5 ± 0.9                | 37.4 ± 0.9             | 37.4 ± 0.9             | 37.7 ± 0.8             | 37.6 ± 0.8             | 37.5 ± 0.8*            |
| <b>CRP</b> (mg/L, median (IQR)) <sup>a</sup>    | 10 (5–14)                 | 6 (5–18.5)             | 5 (5–11.5)**           | 7.0 (1.5–17.6)         | 7.8 (1.7–20.6)         | 7.0 (1.4–18)           |

Comparisons were done across all three years at each setting: \**p* < 0.05, \*\**p* < 0.01, \*\*\**p* < 0.001.

<sup>a</sup>CRP test used in primary care setting did not specify values < 5 mg/L. Values <5 mg/L are set as 5

<sup>b</sup>Except for two statistically significant changes in vital signs among the hospital patients; a rise in heart rate from 2009 to 2017; 147.7 ± 19.4 to 151.4 ± 19.1 (*p* < 0.01), and a fall in respiratory rate in the same time period; 50.7 ± 11.4 to 48.4 ± 10.4 (*p* < 0.05), there were no significant differences in vital signs or symptoms between the patient populations in the two settings, nor across the years at each setting.

CRP: C-reactive protein; IQR: interquartile range; SD: standard deviation.

**Table 2. Management of children with acute bronchiolitis in primary care and at hospital in Oslo, Norway, before and after introduction of new treatment guidelines in 2013**

|                                                         | Primary care           |                        |                        | Hospital               |                        |                        |
|---------------------------------------------------------|------------------------|------------------------|------------------------|------------------------|------------------------|------------------------|
|                                                         | 2009<br><i>n</i> = 242 | 2014<br><i>n</i> = 239 | 2017<br><i>n</i> = 199 | 2009<br><i>n</i> = 435 | 2014<br><i>n</i> = 374 | 2017<br><i>n</i> = 386 |
| <b>Nebulized racemic adrenaline (<i>n</i> (%))</b>      | 162 (66.9)             | 134 (56.1)             | 32 (16.1)***           | 257 (59.1)             | 50 (13.4)              | 19 (4.9)***            |
| <b>Nebulized saline (<i>n</i> (%))</b>                  | 2 (0.8)                | 52 (21.8)              | 107 (53.8)***          | 171 (39.3)             | 278 (74.3)             | 252 (65.3)***          |
| <b>Nebulized salbutamol (<i>n</i> (%))</b>              | 5 (2.1)                | 9 (3.8)                | 4 (2.0)                | 63 (14.5)              | 36 (9.6)               | 25 (6.5)**             |
| <b>Oxygen supplement (<i>n</i> (%))</b>                 | 5 (2.1)                | 4 (1.7)                | 4 (2.0)                | 43 (9.9)               | 86 (23.0)              | 75 (19.4)***           |
| <b>Betamethasone (<i>n</i> (%))</b>                     | 16 (6.6)               | 13 (5.4)               | 9 (4.5)                | 29 (6.7)               | 16 (4.3)               | 14 (3.6)               |
| <b>Antipyretics (<i>n</i> (%))</b>                      | 7 (2.9)                | 20 (8.4)               | 5 (2.5)**              | 27 (6.2)               | 34 (9.1)               | 50 (13.0)***           |
| <b>Chest X-ray (<i>n</i> (%))</b>                       | 10 (4.1)               | 0 (0.0)                | 0 (0.0)***             | 135 (31.0)             | 67 (17.9)              | 74 (19.2)***           |
| <b>Referral to hospital (<i>n</i> (%))</b>              | 93 (38.4)              | 107 (44.8)             | 79 (39.7)              | Not applicable         |                        |                        |
| <b>Hospitalization days (<i>mean</i> ± <i>SD</i>)</b>   |                        |                        |                        | 2.7 ± 3.8              | 2.7 ± 3.0              | 2.2 ± 2.4              |
| <b>Hospitalized less than 24 hours (<i>n</i> (%))</b>   |                        |                        |                        | 217 (49.9)             | 197 (52.7)             | 237 (61.4)**           |
| <b>Highflow nasal oxygen (<i>n</i> (%))</b>             |                        |                        |                        | 0 (0.0)                | 20 (5.3)               | 38 (9.8)***            |
| <b>CPAP/BPAP (<i>n</i> (%))</b>                         |                        |                        |                        | 19 (4.4)               | 27 (7.2)               | 23 (6.0)               |
| <b>Respirator/mechanical ventilation (<i>n</i> (%))</b> | Not applicable         |                        |                        | 6 (1.4)                | 7 (1.9)                | 7 (1.8)                |
| <b>Nasogastric tube (<i>n</i> (%))</b>                  |                        |                        |                        | 40 (9.2)               | 43 (11.5)              | 56 (14.5)              |
| <b>Microbiological nasopharyngeal testing</b>           |                        |                        |                        | 303 (69.7)             | 278 (74.3)             | 286 (74.1)             |
| <b>Antibiotics in hospital (<i>n</i> (%))</b>           |                        |                        |                        | 8 (1.9)                | 10 (2.7)               | 16 (4.3)               |
| <b>Antibiotics home treatment (<i>n</i> (%))</b>        | 4 (1.7)                | 1 (0.4)                | 1 (0.5)                | 20 (4.6)               | 6 (1.6)                | 11 (2.8)*              |
| <b>Nebulization home-treatment (<i>n</i> (%))</b>       | Not applicable         |                        |                        | 227 (52.2)             | 231 (61.8)             | 238 (61.7)**           |
| <b>Recontact within 48 hours (<i>n</i> (%))</b>         | 39 (16.1)              | 35 (14.6)              | 32 (16.1)              | 37 (8.5)               | 39 (10.4)              | 50 (13.0)              |

Comparisons were done across all three years at each setting: \**p* < 0.05, \*\**p* < 0.01, \*\*\**p* < 0.001.

BPAP: Bilevel positive airway pressure; CPAP: continuous positive airway pressure; SD: standard deviation.

**Table 3 – Microbiological results from nasopharynx swabs in children with acute bronchiolitis treated at hospital in Oslo, Norway, before and after introduction of new treatment guidelines in 2013**

|                                          | <b>2009</b>            | <b>2014</b>    | <b>2017</b>    |
|------------------------------------------|------------------------|----------------|----------------|
|                                          | <i>n</i> = 303         | <i>n</i> = 278 | <i>n</i> = 286 |
| <b>RS-virus (<i>n</i> (%))</b>           | 181 (59.7)             | 206 (74.1)     | 214 (74.8)     |
| <b>Rhinovirus (<i>n</i> (%))</b>         | <sup>a</sup>           | 126 (45.3)     | 117 (40.9)     |
| <b>Other viruses (<i>n</i> (%))</b>      | 63 (20.8)              | 78 (28.1)      | 73 (25.5)      |
| <b>Bacteria (<i>n</i> (%))</b>           | 5 (1.7)                | 0 (0.0)        | 4 (1.4)        |
| <b>Two or more agents (<i>n</i> (%))</b> | 11 (3.6) <sup>a</sup>  | 79 (28.4)      | 56 (19.6)      |
| <b>Negative results (<i>n</i> (%))</b>   | 87 (28.7) <sup>a</sup> | 16 (5.8)       | 12 (4.2)       |

<sup>a</sup>Rhinovirus was not tested for in 2009.

RS-virus: Respiratory syncytial virus.
